# Supplementary material for: Structural and functional neuroimaging of hippocampus to study adult neurogenesis in long COVID-19 patients with neuropsychiatric symptoms: a scoping review
Source: PeerJ. 2025 Jun 27;13:e19575. doi: 10.7717/peerj.19575 (PMC12208109; doi:10.7717/peerj.19575)
Supplement: Supplemental Information 4 [file peerj-13-19575-s004.xlsx]

## Sheet: Sheet1
Table S3: Neuropsychiatric symptoms studied in the included studies
Author., et al (Year)	Neuropsychiatric symptoms																																Observation
	Headache		Speech impairment		Vision change		hearing loss		Anosmia/hyposmia/dysosmia		Ageusia/hypogeusia/dysgeusia		Myalgia		Decreased appetite		Fatigue		Depressed mood		Anxiety		Mood changes		Cognitive impairment/brain fog		sleep disturbances		Memory impairment		difficulty in concentration
	Yes/No	%	Yes/No	%	Yes/No	%	Yes/No	%	Yes/No	%	Yes/No	%	Yes/No	%	Yes/No	%	Yes/No	%	Yes/No	%	Yes/No	%	Yes/No	%	Yes/No	%	Yes/No	%	Yes/No	%	Yes/No	%
Besteher et al., 2022																	Yes		Yes										Yes		Yes
Cattarinussi et al., 2022
Du et al., 2021	Yes	26.3							Yes	5.6	Yes	5.6	Yes	26.3	yes	5.6	Yes	21.1									yes						LC-Fatigue and myalgia persistent in 1 year and headache increased
Lu et al., 2020	yes	10			yes	1.7	yes	1.67	yes	3.3	yes	1.7	yes	25			yes	6.7					yes	16.7					yes	28.3
Taskiran-Sag et al., 2023	yes								yes		yes										yes				yes		yes
Ergül et al., 2022									yes		yes																						Olfactory disorder score and gustatory disorder scores were higher in LC [(1.55 ± 0.89) and (1.45 ± 1.19)] compared to HC [0]. - modified version of the validated Monell-Jefferson Taste–Smell questionnaire
Esposito et al., 2021	no				no		no		yes	100	yes (hypo)	22.2													no				no				Duration of olfactory symptoms - 36.64± 27.5 (11-89 days)
Yousefi-Koma et al., 2021									Yes	100																							Hyposmia for 3 months
Rothstein, 2023	yes	41.6	yes	41.6					yes	29.1	yes	29.1					yes	87.5							yes	91.6
Balsak et al., 2023	yes	100																															COVID-19 patients with headache were recruited
Tu et al., 2021
Díez-Cirarda et al., 2023									yes	69							yes	81	yes	25							yes	82.1
Wingrove et al., 2023									yes	20.5																							The study group includes 10 COVID-19 patients of age 50.79 years whose anosmia was recovered and 10 young COVID-19 patients of mean age 27.7 years with recovered anosmia in 4-6 weeks
Franke et al., 2023																									yes	100							Self reported symptoms
Mucciolia et al., 2023									yes	100	yes	39.1					yes	73.9	Yes	30	Yes	13			yes	4.3			Yes				olfactory defect associated with dysosmia in 10 (43 %) cases (cacosmia, n =7, phantosmia, n =1, parosmia, n =3) and persistent gustatory dysfunction in 19 (83 %).
CARROLL ET AL 2020																													yes	100			History of forgetfulness
Barnden et al., 2023	yes	80			yes	50			yes	20	yes	20					yes	100									yes	100	yes	30	yes	70	All 10 subjects reported moderate to very severe fatigue, muscle aches and unrefreshing and/or disturbed sleep.
